# Supplementary material
Source: PubMed Central journal article supplement (PMC3055492)

A

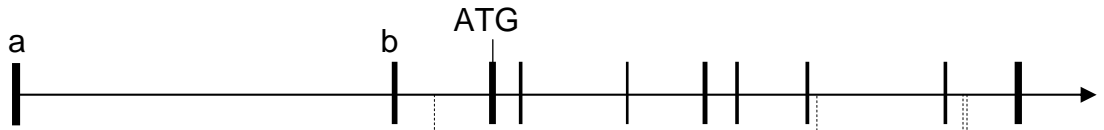

B

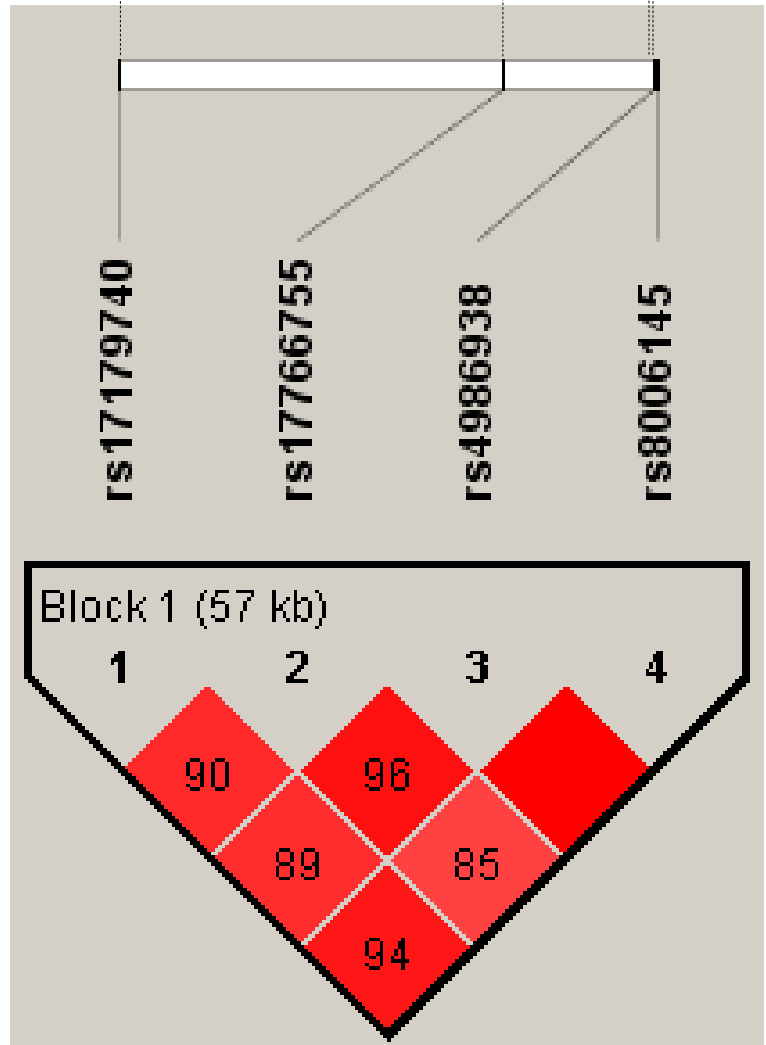

Supplement: npp201049x1.pdf [file npp201049x1.pdf]
